# Supplementary material for: Action Prediction in Younger versus Older Adults: Neural Correlates of Motor Familiarity
Source: PubMed Central journal article supplement (PMC3660406; doi:10.1371/journal.pone.0064195), 2013-05-21
Supplement: pone.0064195.s001.pdf [file pone.0064195.s001.pdf]

**Table S1.** Characteristics of the sample divided by expertise group.

|                         | <b>Figure skating experts</b> | <b>Non-experts</b> |              |          |
|-------------------------|-------------------------------|--------------------|--------------|----------|
|                         | <b>(n = 10)</b>               | <b>(n = 24)</b>    | <b>t(32)</b> | <b>p</b> |
| Age                     | 35.1 (18.4)                   | 41.5 (20.5)        | 0.85         | 0.399    |
| Handedness score        | 86.4 (10.5)                   | 95.0 (7.59)        | 2.69         | 0.011    |
| Years of education      | 15.7 (3.68)                   | 15.2 (2.99)        | 0.41         | 0.686    |
| DSST raw score          | 76.9 (21.8)                   | 74.4 (16.3)        | 0.37         | 0.712    |
| DSST standardized score | 11.3 (2.14)                   | 11.0 (3.56)        | 0.30         | 0.769    |
| SWT raw score           | 30.4 (3.10)                   | 33.5 (2.04)        | 3.50         | 0.001    |
| SWT standardized score  | 0.06 (0.42)                   | 0.61 (0.46)        | 3.26         | 0.003    |

Values represent mean scores and standard deviations (parenthesized). See Table 1 for a description of the scores.
