# Supplementary material for: Action Prediction in Younger versus Older Adults: Neural Correlates of Motor Familiarity
Source: PubMed Central journal article supplement (PMC3660406; doi:10.1371/journal.pone.0064195), 2013-05-21
Supplement: pone.0064195.s002.pdf [file pone.0064195.s002.pdf]

**Table S2.** Effects of each predicted action category compared to baseline collapsed across the whole sample.

| Anatomical region                                | Putative functional name | BA   | Cluster size | MNI coordinates (mm) |     |     | t value     | p value |
|--------------------------------------------------|--------------------------|------|--------------|----------------------|-----|-----|-------------|---------|
|                                                  |                          |      |              | x                    | y   | z   | df = [1,33] | (corr.) |
| <i>(A) Figure skating elements &gt; Baseline</i> |                          |      |              |                      |     |     |             |         |
| L Middle Occipital Gyrus                         | V5/hMT+                  | 19   | 2101         | -45                  | -73 | 4   | 18.71       | < 0.001 |
| R Middle Temporal Gyrus                          | V5/hMT+                  | 19   |              | 48                   | -70 | 1   | 13.06       |         |
| R Fusiform Gyrus                                 |                          | 37   |              | 42                   | -46 | -20 | 11.30       |         |
| R Superior Frontal Gyrus                         | SMA                      | 6    | 4931         | 9                    | 5   | 55  | 14.67       | < 0.001 |
| L Superior Frontal Gyrus                         | SMA                      | 6    |              | -6                   | 8   | 52  | 13.99       |         |
| R Middle Frontal Gyrus/R Precentral Gyrus        | PMd                      | 6    |              | 42                   | -1  | 46  | 13.30       |         |
| R Superior Temporal Gyrus                        | TPJ                      | 22   | 170          | 66                   | -34 | 16  | 8.56        | 0.008   |
| R Midbrain                                       |                          |      | 444          | 6                    | -25 | -11 | 7.97        | < 0.001 |
| L Midbrain                                       |                          |      |              | -3                   | -25 | -11 | 7.84        |         |
| R Putamen/R Globus Pallidum                      |                          |      |              | 18                   | 8   | 1   | 5.36        |         |
| R Superior Parietal Lobule                       | SPL                      | 7    | 318          | 30                   | -46 | 46  | 6.77        | < 0.001 |
| R Supramarginal Gyrus                            | IPL                      | 7/40 |              | 36                   | -34 | 43  | 6.28        |         |
| R Postcentral Gyrus                              | S1                       | 2    |              | 57                   | -22 | 40  | 3.98        |         |

*(B) Movement exercises > Baseline*

|                          |         |    |      |     |      |     |       |         |
|--------------------------|---------|----|------|-----|------|-----|-------|---------|
| L Middle Occipital Gyrus | V5/hMT+ | 19 | 641  | -45 | -73  | 4   | 15.77 | < 0.001 |
| L Middle Occipital Gyrus | V2/V3   | 18 |      | -12 | -100 | 7   | 8.52  |         |
| R Superior Frontal Gyrus | SMA     | 6  | 7549 | 9   | 5    | 55  | 13.45 | < 0.001 |
| R Middle Temporal Gyrus  | V5/hMT+ | 19 |      | 48  | -70  | -2  | 13.04 |         |
| L Superior Frontal Gyrus | SMA     | 6  |      | -6  | 5    | 52  | 12.77 |         |
| R Midbrain               |         |    | 320  | 6   | -25  | -11 | 7.69  | < 0.001 |
| L Midbrain               |         |    |      | -6  | -25  | -5  | 6.74  |         |

---

Regions activated during the prediction of figure skating elements (A) and movement exercises (B) compared to baseline. Results are collapsed across the whole sample using a voxel-wise threshold of  $p < 0.001$  and a minimum cluster size of 10 voxels. Only clusters are reported that reached cluster-corrected significance of  $p < 0.05$ , FWE corrected. Up to three local maxima are listed when a cluster has multiple peaks more than 8 mm apart. Abbreviations for brain regions: V5/hMT+, visual area V5/extrastriate visual cortex/middle temporal; SMA, supplementary motor area; PMd, dorsal premotor cortex; TPJ, temporoparietal junction; SPL, superior parietal lobule; IPL, inferior parietal lobule; S1, primary somatosensory area; V2, visual area V2/prestriate visual cortex; V3, visual area V3/extrastriate visual cortex.
