# Supplementary material for: Action Prediction in Younger versus Older Adults: Neural Correlates of Motor Familiarity
Source: PubMed Central journal article supplement (PMC3660406; doi:10.1371/journal.pone.0064195), 2013-05-21
Supplement: pone.0064195.s003.pdf [file pone.0064195.s003.pdf]

**Table S3.** Effects of predicted action category within each age group.

| Anatomical region                                          | Putative functional name | BA    | Cluster size | MNI coordinates (mm) |     |     | t value | p value (corr.) |
|------------------------------------------------------------|--------------------------|-------|--------------|----------------------|-----|-----|---------|-----------------|
|                                                            |                          |       |              | x                    | y   | z   |         |                 |
| <i>(A) Figure skating elements &gt; Movement exercises</i> |                          |       |              |                      |     |     |         |                 |
| <u>Younger adults <math>df = [1,17]</math></u>             |                          |       |              |                      |     |     |         |                 |
| R Lingual Gyrus                                            | V2/V3                    | 18    | 3223         | 12                   | -73 | -8  | 10.44   | < 0.001         |
| Midline Calcerine Gyrus                                    | V1                       | 17    |              | 0                    | -88 | -5  | 8.86    |                 |
| R Cuneus                                                   | V3                       | 18/19 |              | 12                   | -88 | 34  | 8.23    |                 |
| <u>Older adults <math>df = [1,13]</math></u>               |                          |       |              |                      |     |     |         |                 |
| Midline Calcerine Gyrus                                    | V1                       | 17    | 1458         | 0                    | -91 | -8  | 8.90    | < 0.001         |
| R Fusiform Gyrus                                           |                          | 19    |              | 24                   | -64 | -11 | 8.58    |                 |
| R Lingual Gyrus                                            | V1                       | 17    |              | 15                   | -64 | 1   | 7.73    |                 |
| L Medial Orbitofrontal Gyrus                               | OFC                      | 32    | 88           | -6                   | 35  | -8  | 5.92    | 0.019           |
| R Medial Orbitofrontal Gyrus                               | OFC                      | 32    |              | 6                    | 38  | -8  | 4.96    |                 |
| <i>(B) Movement exercises &gt; Figure skating elements</i> |                          |       |              |                      |     |     |         |                 |
| <u>Younger adults <math>df = [1,17]</math></u>             |                          |       |              |                      |     |     |         |                 |
| R Middle Frontal Gyrus/R Precentral Gyrus                  | PMd                      | 6     | 97           | 33                   | -7  | 49  | 6.67    | 0.026           |

|                                              |         |        |     |     |     |    |       |         |
|----------------------------------------------|---------|--------|-----|-----|-----|----|-------|---------|
| R Supramarginal Gyrus                        | IPL     | 40     | 159 | 54  | -28 | 37 | 6.35  | 0.003   |
| R Inferior Parietal Lobule                   | IPL     | 40     |     | 45  | -34 | 46 | 4.61  |         |
| R Superior Parietal Lobule                   | SPL     | 7      | 214 | 33  | -49 | 58 | 6.15  | 0.001   |
| R Superior Parietal Lobule                   | SPL     | 7      |     | 21  | -58 | 58 | 5.22  |         |
| R Inferior Temporal Gyrus                    | V5/hMT+ | 19     | 167 | 48  | -73 | -5 | 5.96  | 0.002   |
| R Middle Temporal Gyrus                      | MTG     | 39     |     | 45  | -61 | 7  | 5.37  |         |
| R Inferior Frontal Gyrus (pars opercularis)  | PMv     | 44     | 109 | 57  | 11  | 25 | 5.77  | 0.017   |
| L Inferior Parietal Lobule                   | IPL     | 40     | 106 | -39 | -31 | 37 | 4.90  | 0.019   |
| <u>Older adults <math>df = [1,13]</math></u> |         |        |     |     |     |    |       |         |
| R Postcentral Gyrus                          | S1      | 2      | 905 | 36  | -37 | 52 | 10.49 | < 0.001 |
| R Intraparietal Sulcus                       | IPS     | 7/40   |     | 36  | -46 | 52 | 9.74  |         |
| R Intraparietal Sulcus                       | IPS     | 7      |     | 33  | -67 | 46 | 5.97  |         |
| L Intraparietal Sulcus                       | IPS     | 7/40   | 660 | -39 | -43 | 49 | 9.00  | < 0.001 |
| L Intraparietal Sulcus                       | IPS     | 7/2/40 |     | -30 | -40 | 43 | 8.05  |         |
| L Superior Parietal Lobule                   | SPL     | 5/2    |     | -30 | -49 | 61 | 7.14  |         |
| L Middle Temporal Gyrus                      | MTG     | 39     | 98  | -48 | -67 | 7  | 8.62  | 0.012   |
| R Superior Temporal Gyrus                    | pSTS    | 22     | 370 | 63  | -46 | 13 | 8.01  | < 0.001 |
| R Superior Temporal Gyrus                    | STG     | 42     |     | 60  | -37 | 16 | 7.94  |         |

|                                             |      |    |     |     |     |    |      |         |
|---------------------------------------------|------|----|-----|-----|-----|----|------|---------|
| R Middle Temporal Gyrus                     | pSTS | 22 |     | 60  | -46 | 4  | 7.29 |         |
| R Inferior Frontal Gyrus (pars opercularis) | PMv  | 44 | 322 | 45  | 8   | 16 | 6.69 | < 0.001 |
| R Inferior Frontal Gyrus (pars opercularis) | PMv  | 44 |     | 57  | 17  | 28 | 6.53 |         |
| R Precentral Gyrus                          | PMv  | 6  |     | 48  | 5   | 31 | 5.57 |         |
| L Superior Frontal Gyrus                    | SMA  | 6  | 158 | -9  | -1  | 52 | 6.65 | 0.001   |
| L Superior Frontal Gyrus                    | PMd  | 6  |     | -24 | -10 | 55 | 5.83 |         |
| L Superior Frontal Gyrus                    | SMA  | 6  |     | -9  | -19 | 58 | 5.01 |         |

---

Regions activated during the prediction of figure skating elements compared to movement exercises (A) and vice versa (B) in younger and older adults while controlling for figure skating expertise. Results were calculated using a voxel-wise threshold of  $p < 0.001$  and a minimum cluster size of 10 voxels. Only clusters are reported that reached cluster-corrected significance of  $p < 0.05$ , FWE corrected. Up to three local maxima are listed when a cluster has multiple peaks more than 8 mm apart. Abbreviations for brain regions: V2, visual area V2/prestriate visual cortex; V3, visual area V3/extrastriate visual cortex; V1, visual area V1/striate visual cortex; OFC, orbitofrontal cortex; PMd, dorsal premotor cortex; IPL, inferior parietal lobule; SPL, superior parietal lobule; V5/hMT+, visual area V5/extrastriate visual cortex/middle temporal; MTG, middle temporal gyrus; PMv, ventral premotor cortex; S1, primary somatosensory area; IPS, intraparietal sulcus; pSTS, posterior superior temporal sulcus; STG, superior temporal gyrus; SMA, supplementary motor area.
