# Supplementary material for: Action Prediction in Younger versus Older Adults: Neural Correlates of Motor Familiarity
Source: PubMed Central journal article supplement (PMC3660406; doi:10.1371/journal.pone.0064195), 2013-05-21
Supplement: pone.0064195.s004.pdf [file pone.0064195.s004.pdf]

**Table S4.** Effects of predicted action category within each expertise group.

| Anatomical region                                          | Putative functional name | BA    | Cluster size | MNI coordinates (mm) |     |    | t value | p value (corr.) |
|------------------------------------------------------------|--------------------------|-------|--------------|----------------------|-----|----|---------|-----------------|
|                                                            |                          |       |              | x                    | y   | z  |         |                 |
| <i>(A) Figure skating elements &gt; Movement exercises</i> |                          |       |              |                      |     |    |         |                 |
| <u>Figure skating experts <math>df = [1,8]</math></u>      |                          |       |              |                      |     |    |         |                 |
| R Cuneus                                                   | V1/V2                    | 17/18 | 519          | 6                    | -88 | 16 | 17.37   | < 0.001         |
| R Calcerine Gyrus                                          | V1/V2                    | 17/18 |              | 3                    | -85 | -5 | 14.98   |                 |
| R Lingual Gyrus                                            | V2                       | 18    |              | 9                    | -79 | -8 | 12.50   |                 |
| L Caudate                                                  |                          |       | 188          | -9                   | -7  | 16 | 8.76    | < 0.001         |
| L Thalamus                                                 |                          |       |              | -6                   | -7  | 1  | 8.33    |                 |
| L Putamen                                                  |                          |       |              | -24                  | -16 | 13 | 8.15    |                 |
| R Thalamus                                                 |                          |       | 63           | 9                    | -7  | -2 | 7.02    | 0.038           |
| R Thalamus                                                 |                          |       |              | 9                    | -1  | 4  | 6.06    |                 |
| R Caudate                                                  |                          |       |              | 9                    | 5   | 10 | 5.60    |                 |
| <u>Non-experts <math>df = [1,22]</math></u>                |                          |       |              |                      |     |    |         |                 |
| R Parahippocampal/Lingual Gyrus                            |                          | 18    | 2944         | 27                   | -49 | -2 | 9.67    | < 0.001         |
| R Lingual Gyrus                                            | V3                       | 18/19 |              | 15                   | -70 | -8 | 9.37    |                 |

|                           |     |     |    |     |     |    |      |       |
|---------------------------|-----|-----|----|-----|-----|----|------|-------|
| Midline Calcerine Gyrus   | V1  | 17  |    | 0   | -88 | -5 | 8.86 |       |
| L Superior Frontal Gyrus  | SFG | 8   | 92 | -12 | 41  | 52 | 5.60 | 0.033 |
| L Superior Frontal Sulcus | SFS | 8/9 |    | -24 | 29  | 55 | 4.99 |       |
| L Superior Frontal Gyrus  | SFG | 8   |    | -12 | 32  | 58 | 4.83 |       |

*(B) Movement exercises > Figure skating elements*

Figure skating experts  $df = [1,8]$

----- No suprathreshold activations -----

Non-experts  $df = [1,22]$

|                                             |         |       |      |     |     |    |      |         |
|---------------------------------------------|---------|-------|------|-----|-----|----|------|---------|
| L Precuneus                                 |         | 7     | 1050 | -9  | -58 | 58 | 7.95 | < 0.001 |
| L Intraparietal Sulcus                      | IPS     | 7/40  |      | -42 | -40 | 49 | 7.10 |         |
| L Superior Frontal Gyrus                    | PMd     | 6     |      | -24 | -10 | 55 | 6.74 |         |
| R Supramarginal Gyrus                       | IPL     | 2/40  | 1043 | 48  | -34 | 43 | 7.61 | < 0.001 |
| R Superior Parietal Lobule                  | SPL     | 7     |      | 36  | -49 | 58 | 7.09 |         |
| R Postcentral Gyrus                         | S1      | 2     |      | 54  | -25 | 43 | 6.68 |         |
| R Inferior Frontal Gyrus (pars opercularis) | PMv     | 44    | 714  | 51  | 8   | 28 | 7.49 | < 0.001 |
| R Middle Frontal Gyrus                      | PMd     | 6     |      | 36  | -7  | 52 | 7.27 |         |
| R Superior Frontal Sulcus                   | SFS     | 6/8   |      | 24  | 11  | 43 | 4.28 |         |
| R Superior Temporal Gyrus                   | TPJ/STG | 22/42 | 442  | 60  | -34 | 16 | 6.76 | < 0.001 |
| R Middle Temporal Gyrus                     | MTG     | 37/39 |      | 57  | -61 | 1  | 6.41 |         |

|                                             |         |      |     |     |     |    |      |       |
|---------------------------------------------|---------|------|-----|-----|-----|----|------|-------|
| R Middle Temporal Gyrus                     | pSTS    | 22   |     | 57  | -40 | 7  | 5.96 |       |
| L Middle Occipital Gyrus                    | V5/hMT+ | 39   | 139 | -45 | -70 | 4  | 5.44 | 0.007 |
| L Middle Occipital Gyrus                    | V5/hMT+ | 19   |     | -45 | -76 | -2 | 5.32 |       |
| L Precentral Gyrus                          | PMv     | 6/44 | 107 | -48 | 5   | 19 | 4.93 | 0.019 |
| L Precentral Gyrus                          | PMv     | 6    |     | -51 | 5   | 37 | 4.76 |       |
| L Inferior Frontal Gyrus (pars opercularis) | PMv     | 44   |     | -54 | 8   | 10 | 3.94 |       |

---

Regions activated during the prediction of figure skating elements compared to movement exercises (A) and vice versa (B) in figure skating experts and non-experts while controlling for age group. Results were calculated using a voxel-wise threshold of  $p < 0.001$  and a minimum cluster size of 10 voxels. Only clusters are reported that reached cluster-corrected significance of  $p < 0.05$ , FWE corrected. Up to three local maxima are listed when a cluster has multiple peaks more than 8 mm apart. Abbreviations for brain regions: V1, visual area V1/striate visual cortex; V2, visual area V2/prestriate visual cortex; V3, visual area V3/extrastriate visual cortex; SFG, superior frontal gyrus; SFS, superior frontal sulcus; IPS, intraparietal sulcus; PMd, dorsal premotor cortex; IPL, inferior parietal lobule; SPL, superior parietal lobule; S1, primary somatosensory area; PMv, ventral premotor cortex; TPJ, temporoparietal junction; STG, superior temporal gyrus; MTG, middle temporal gyrus; pSTS, posterior superior temporal sulcus; V5/hMT+, visual area V5/extrastriate visual cortex/middle temporal.
